# Supplementary material for: ZBTB7A regulates MDD-specific chromatin signatures and astrocyte-mediated stress vulnerability in orbitofrontal cortex
Source: PubMed Central journal article supplement (PMC10187272; doi:10.1101/2023.05.04.539425), 2023-05-04
Supplement: NIHPP2023.05.04.539425v1-supplement-9.pdf [file NIHPP2023.05.04.539425v1-supplement-9.pdf]

1773 **Supplemental Figures and Figure Legends**

1774 **Note that full statistics information is provided in the Supplemental Statistics Table S7.**

1775

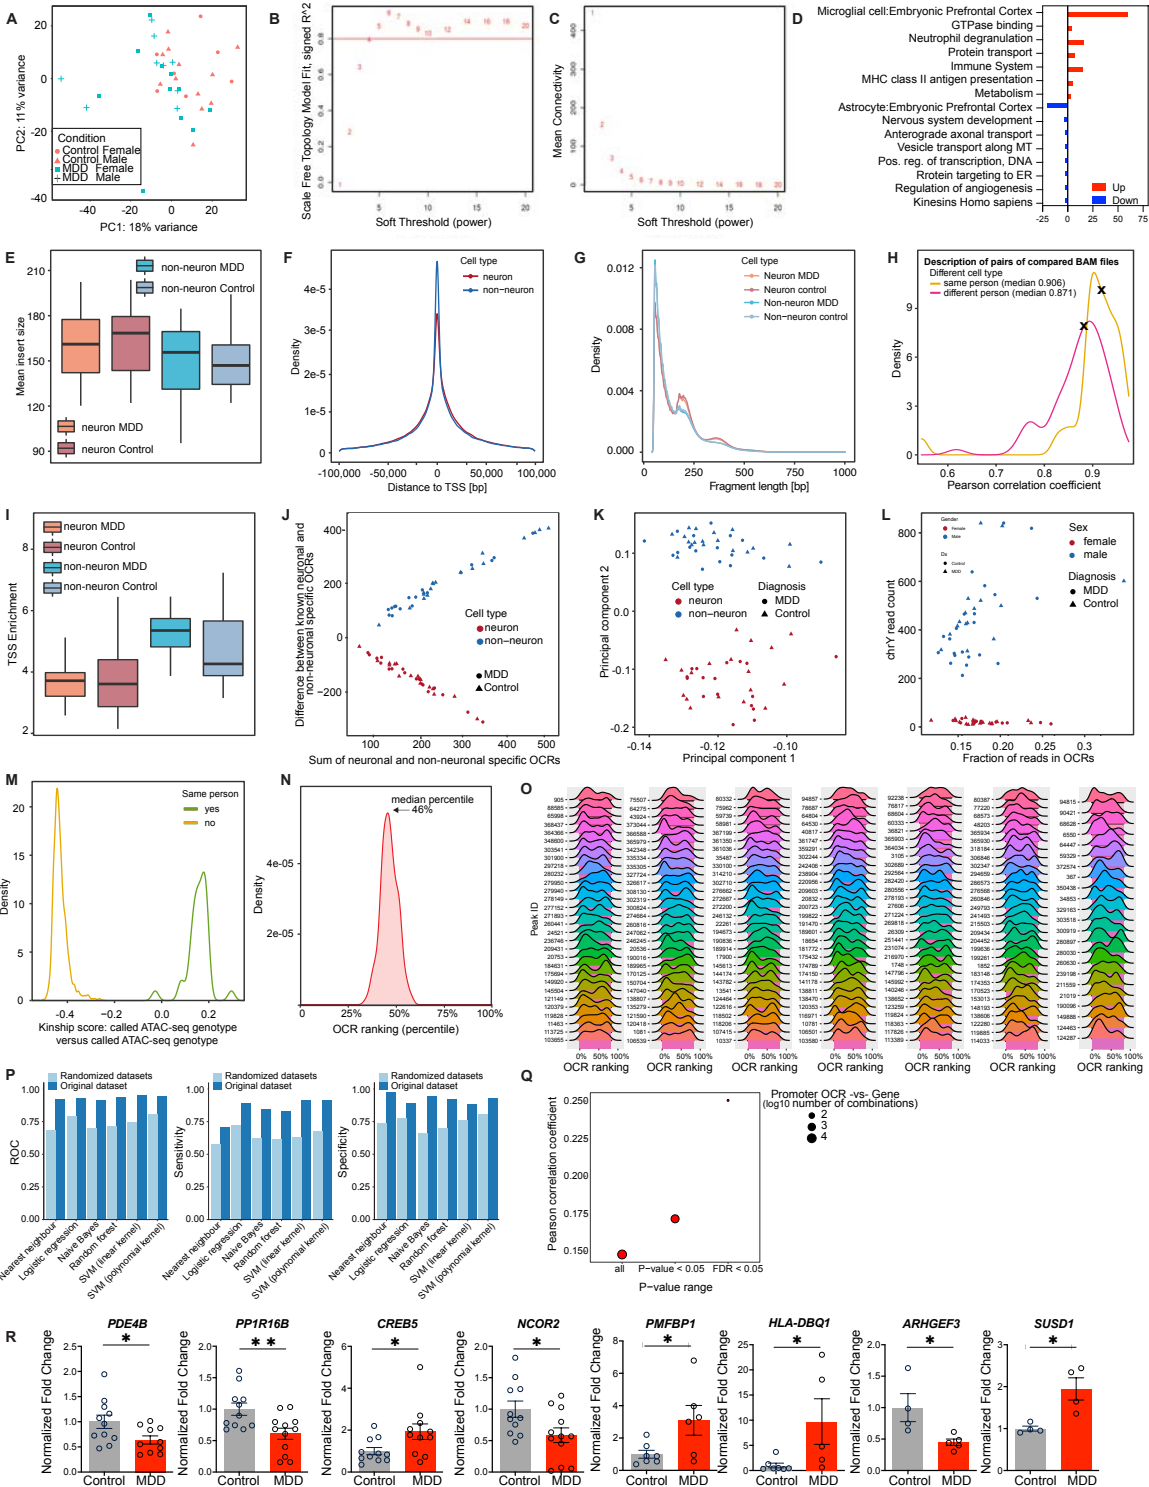

1776

1777

1778 **Supplemental Figure 1. Quality control metrics for human postmortem MDD molecular**  
1779 **profiling.**

1780  
1781 (A) Principal component analysis of sample gene expression levels. (B) Analysis of scale-free fit  
1782 index for possible soft-thresholding powers ( $\beta$ ). (C) Analysis of mean connectivity for possible  
1783 soft-thresholding powers. (D) GO analysis for 1,450 DE genes between MDD and control groups,  
1784 separated by up/down regulation. (E) Fraction of uniquely mapped, non-duplicated, non-chrM  
1785 paired-end reads compared to all reads in raw sequencing files. (F) Number of uniquely mapped,  
1786 non-duplicated, non-chrM paired-end reads. (G) Fraction of duplicated to uniquely mapped  
1787 paired-end reads. (H) Fraction of mitochondrial DNA reads to uniquely mapped, non-duplicated  
1788 paired-end reads. (I) Number of OCRs (called per sample). (J) Fraction of reads in OCRs (FRiP).  
1789 (K) GC-content in consensus set of OCRs; (L) Median insert size. For all whisker plots in this  
1790 figure: The center line indicates the median, the box shows the interquartile range, whiskers  
1791 indicate the highest/lowest values within 1.5x the interquartile range. (M) Genotype check based  
1792 on pair-wise comparison of genotypes called from ATAC-seq samples. Pairs of neuronal and non-  
1793 neuronal samples supposedly originating from the same person have distinctly higher scores  
1794 (green line) than pairs of samples from different individuals (yellow line). (N) Summary and (O)  
1795 per-OCR distribution of  $P$ -value ranking for the reported set of 203 differentially accessible OCRs  
1796 within differentially analyses results generated on the datasets of non-neuronal samples with  
1797 randomly permuted MDD and Control status ( $n=100$  permuted datasets). This analysis proves  
1798 that the reported set of 203 differentially accessible OCRs (median percentile of  $P$ -value is 1%)  
1799 are not affected by technical artifacts since their median percentile of  $P$ -value in the datasets with  
1800 permuted MDD and Control status is 46% (further details in Methods: Differential analysis of  
1801 chromatin accessibility). (P) Performance of machine learning classifiers built on the reported set  
1802 of 203 differential OCRs and 203 random OCRs. To enable the robust performance evaluation,  
1803 the repeated 5-fold cross-validation was applied ( $k_{repeat} = 10$ ); additionally, the whole process was  
1804 repeated 10 times with different sets of 203 randomly selected OCRs. For all whisker plots in this  
1805 figure: The center line indicates the median, the box shows the interquartile range, whiskers  
1806 indicate the highest/lowest values within 1.5x the interquartile range. Student's two-tailed t-tests  
1807 were performed for statistical comparisons,  $*=p<.05$ ,  $**=p<.01$ . Data displayed as mean (+/-  
1808 SEM).

1809  
1810  
1811

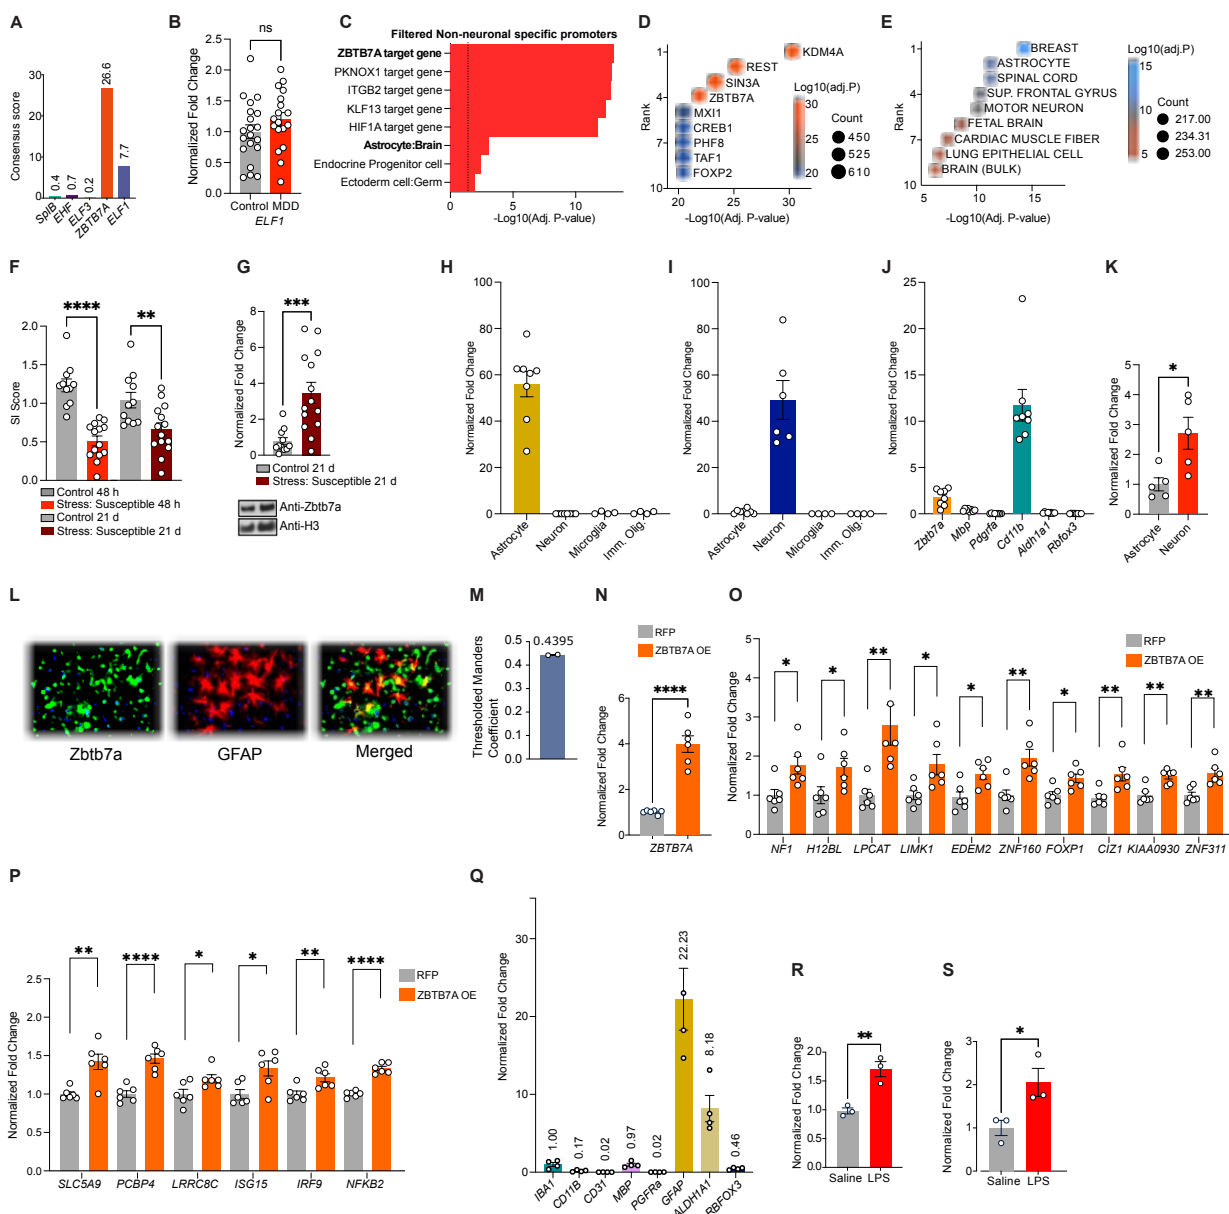

1812

1813 **Supplemental Figure 2. Identification and characterization of ZBTB7A in human MDD and**  
 1814 **mouse chronic stress OFC.**

1815  
 1816 **(A)** Consensus score from the Human Protein Atlas<sup>1</sup> for expression in human brain for each factor.

1817 The mRNA expression data is derived from deep sequencing of RNA (RNA-seq) from 37 different  
 1818 normal tissue types. **(B)** Normalized fold change for mRNA expression for ELF1 in bulk human

1819 OFC tissues, control vs. MDD. **(C)** GO analysis with CellMarker Augmented Database<sup>2</sup> and CHEA  
 1820 ENCODE Consensus database<sup>3</sup> for genes in detected non-neuronal specific promoters, filtered

1821 by logFC > 1, (+/-) 3000bp from TSS **(D)** Overlap between DE genes from MDD vs. control OFC  
 1822 tissues<sup>4</sup> and ENCODE consensus target gene sets via EnrichR, plotted by rank (y-axis) and -

1823  $\log_{10}$ (adjusted  $p$ -value) on the x-axis and by fill color. Bubble size displays the number of  
1824 overlapping genes for each term. **(E)** Overlap between ZBTB7A target genes (from TRANSFAC)  
1825 and ARCHS4 human tissue expression reference gene sets via EnrichR. plotted by rank (y-axis)  
1826 and  $-\log_{10}$ (Adjusted P-value) on the x-axis and by fill color. Bubble size displays the number of  
1827 overlapping genes for each term. **(F)** Social interaction ratio for control vs. chronically stressed  
1828 CSDS mouse groups at 48 h post-stress and 21 d post-stress. **(G)** Normalized fold change protein  
1829 expression of *Zbtb7a* in mouse OFC bulk tissues collected from control vs. chronically stressed  
1830 mouse groups at 21 d post-stress. **(H)** qPCR expression data for astrocyte-specific gene *Aldh1a1*  
1831 in MACs-isolated cell fractions **(I)** qPCR expression data for neuron-specific *Rbfox3* (*NeuN* in  
1832 MACs-isolated cell fractions). **(J)** qPCR expression data for cell type-specific genes in negative  
1833 fraction from MACs-isolated astrocyte and neuron cell fractions, showing the negative fraction is  
1834 enriched for microglia marker *Cd11b*. **(K)** qPCR expression data for *Zbtb7a* in MACs-isolated  
1835 astrocyte vs. neuron cell fractions. **(L)** 20x IHC images showing *Zbtb7a* protein is expressed in  
1836 mouse OFC astrocytes, depicts overlap of *Zbtb7a* with astrocyte-specific marker *Gfap*. **(M)**  
1837 Thresholded Mander's coefficient describes overlap of color channels of interest. **(N)** Expression  
1838 of *ZBTB7A* mRNA in human primary cultured astrocytes treated with *ZBTB7A* OE lentivirus vs.  
1839 RFP empty vector control virus. **(O-P)** Bar graph showing normalized fold change of mRNA  
1840 expression in ZBT-OE vs. RFP human primary cultured astrocytes for the listed gene targets. **(Q)**  
1841 Normalized fold change of cell-type specific marker genes in human primary astrocyte-enriched  
1842 cultures. **(R)** Normalized fold change of *ZBTB7A* mRNA expression in cultured human astrocytes  
1843 treated with saline vs. LPS. **(S)** Normalized fold change of *Zbtb7a* mRNA expression in cultured  
1844 mouse astrocytes treated with saline vs. LPS. Student's two-tailed t-tests or 1-way ANOVA with  
1845 MC tests were performed for statistical comparisons. Data presented as mean (+/- SEM). \*= $p < .05$ ,  
1846 \*\*= $p < .01$ , \*\*\*= $p < .001$ , \*\*\*\*= $p < .0001$ .

1847

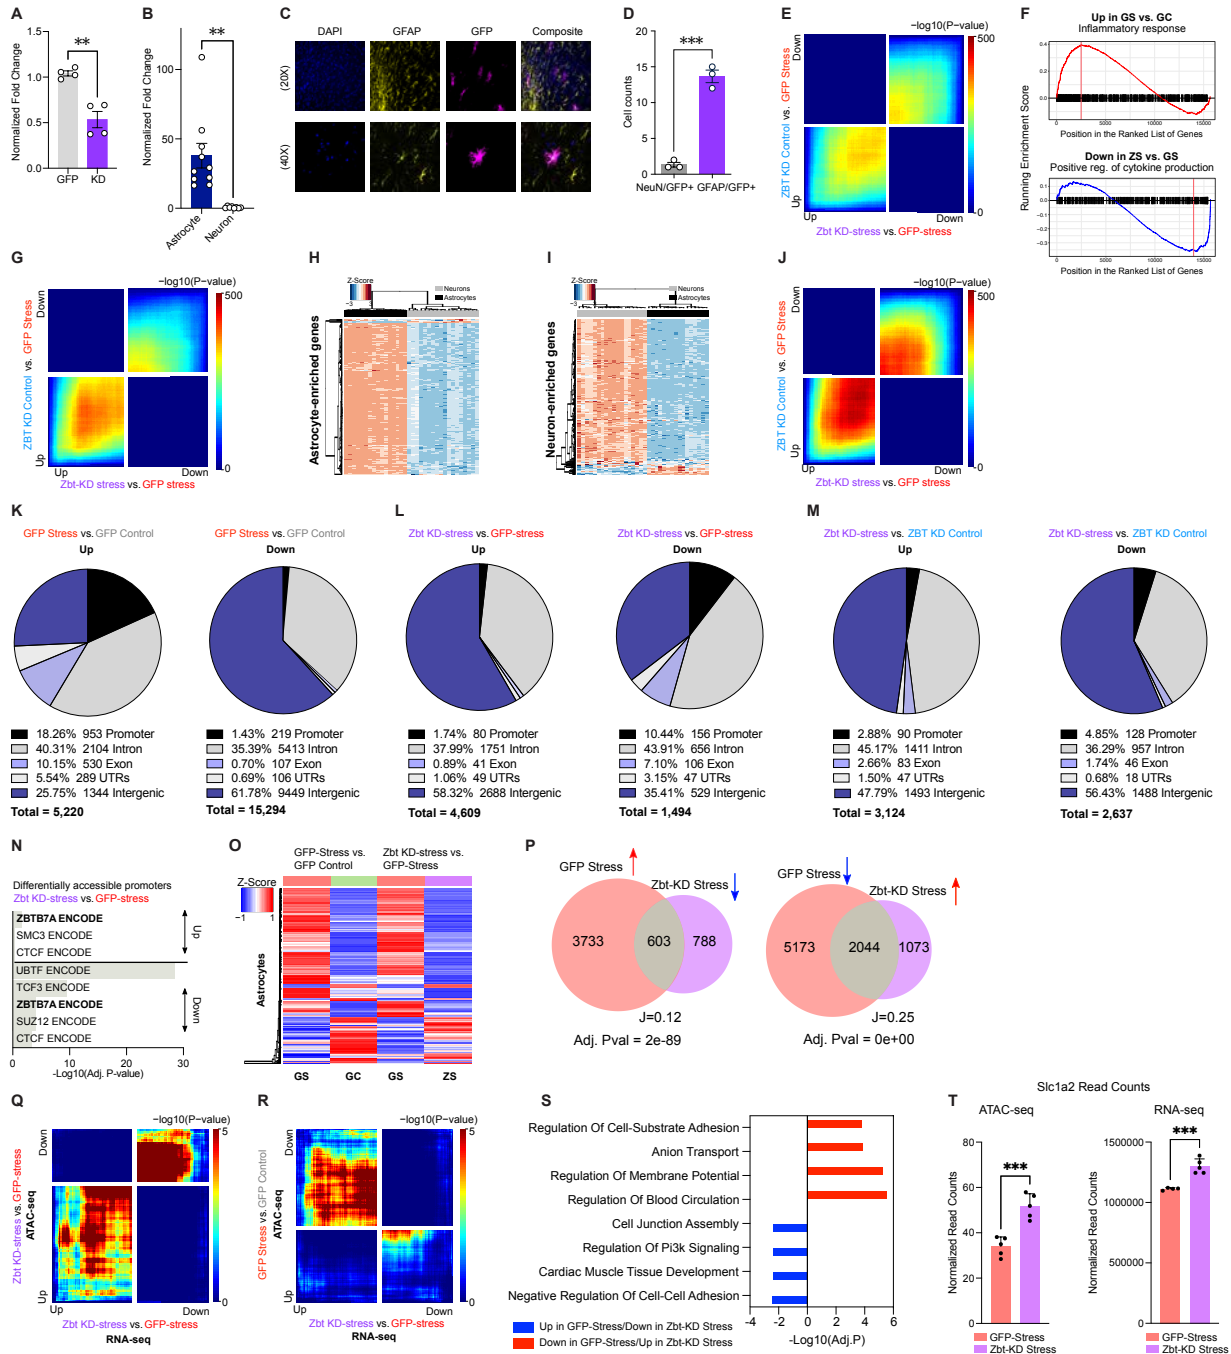

1848

1849

1850

1851

1852

1853

1854

1855

1856

### Supplemental Figure 3. *Zbtb7a* KD alters cell-type specific chromatin accessibility and gene expression.

(A) Normalized fold change of qPCR *Zbtb7a* gene expression from OFC tissues transduced with Zbt-KD virus vs. miR-neg-GFP (GFP), with n = 4/group. (B) qPCR expression levels of the GFP transgene in MACs-isolated neurons vs. astrocytes from AAV6-GFAP-miR-neg-GFP virally-transduced OFC mouse tissues. (C) Representative IHC images of OFC tissues transduced with an rAAV6 virus expressing ZBTB7A-GFP (in magenta) overlaid with a nuclear co-stain (DAPI in

1857 blue) and GFAP (in yellow) to show astrocyte-specific expression. **(D)** Cell counts in OFC tissues  
1858 transduced with AAV6-ZBTB7A-GFP of cells co-expressing Gfap/Zbtb7a or NeuN/Zbtb7a. **(E)**  
1859 RRHO comparing gene expression for the indicated comparisons, in bulk OFC tissue. **(F)** GSEA  
1860 enrichment plot for most significantly enriched gene set in GFP Stress vs. GFP Control and ZBT  
1861 stress vs. GFP Stress in bulk OFC tissue. The enrichment plot shows a line representing the  
1862 running ES for a given GO as the analysis goes down the ranked list. The value at the peak is the  
1863 final ES. **(G)** RRHO comparing gene expression for the indicated comparisons, in MACS-isolated  
1864 astrocytes. **(H-I)** Heatmaps depict unsupervised clustering of normalized read count values in  
1865 MACS-isolated astrocytes and neurons for (H) 239 astrocyte-enriched genes and (I) 279 neuron  
1866 enriched genes identified in previous report<sup>5</sup>. **(J)** RRHO comparing gene expression for the  
1867 indicated comparisons, in MACS-isolated neurons. **(K-M)** ATAC-seq diffReps analysis of  
1868 differential accessibility between indicated conditions. Pie charts indicate distribution of differential  
1869 accessibility events, stratified by genomic context for the indicated conditions and separated for  
1870 up/down events. **(N)** Gene ontology (GO) pathway analysis of differentially accessible promoters  
1871 from Zbt-KD stress vs. GFP stress [less accessible promoters, top] and GFP stress vs. GFP  
1872 control [more accessible promoters, bottom]. **(O)** Clustering of groups at 1,138 overlapping  
1873 genomic regions between GFP Stress vs. GFP control and Zbt-KD stress vs. GFP stress,  
1874 depicting Z-score of log<sub>2</sub>FC accessibility. **(P)** Scaled Venn diagram and odds ratio analyses of  
1875 the number of shared and distinct OCR gene targets between indicated conditions. Numbers  
1876 indicate differentially accessible peaks, “J” indicates the Jaccard index. **(Q-R)** RRHO comparing  
1877 gene expression and chromatin accessibility for the indicated comparisons. **(S)** GO pathway  
1878 analysis of rescued OCR gene targets between Zbt-KD Stress and GFP Stress MACS-isolated  
1879 astrocytes ATAC-seq. **(T)** Normalized read counts for accessibility (left) and gene expression  
1880 (right) at *Slc1a2* gene in MACS-isolated astrocytes. Data were analyzed with Student’s two-tailed  
1881 t-tests. \*= $p < .05$ , \*\*= $p < .01$ , \*\*\*= $p < .001$ , \*\*\*\*= $p < .0001$ . All data graphed as means  $\pm$  SEM.

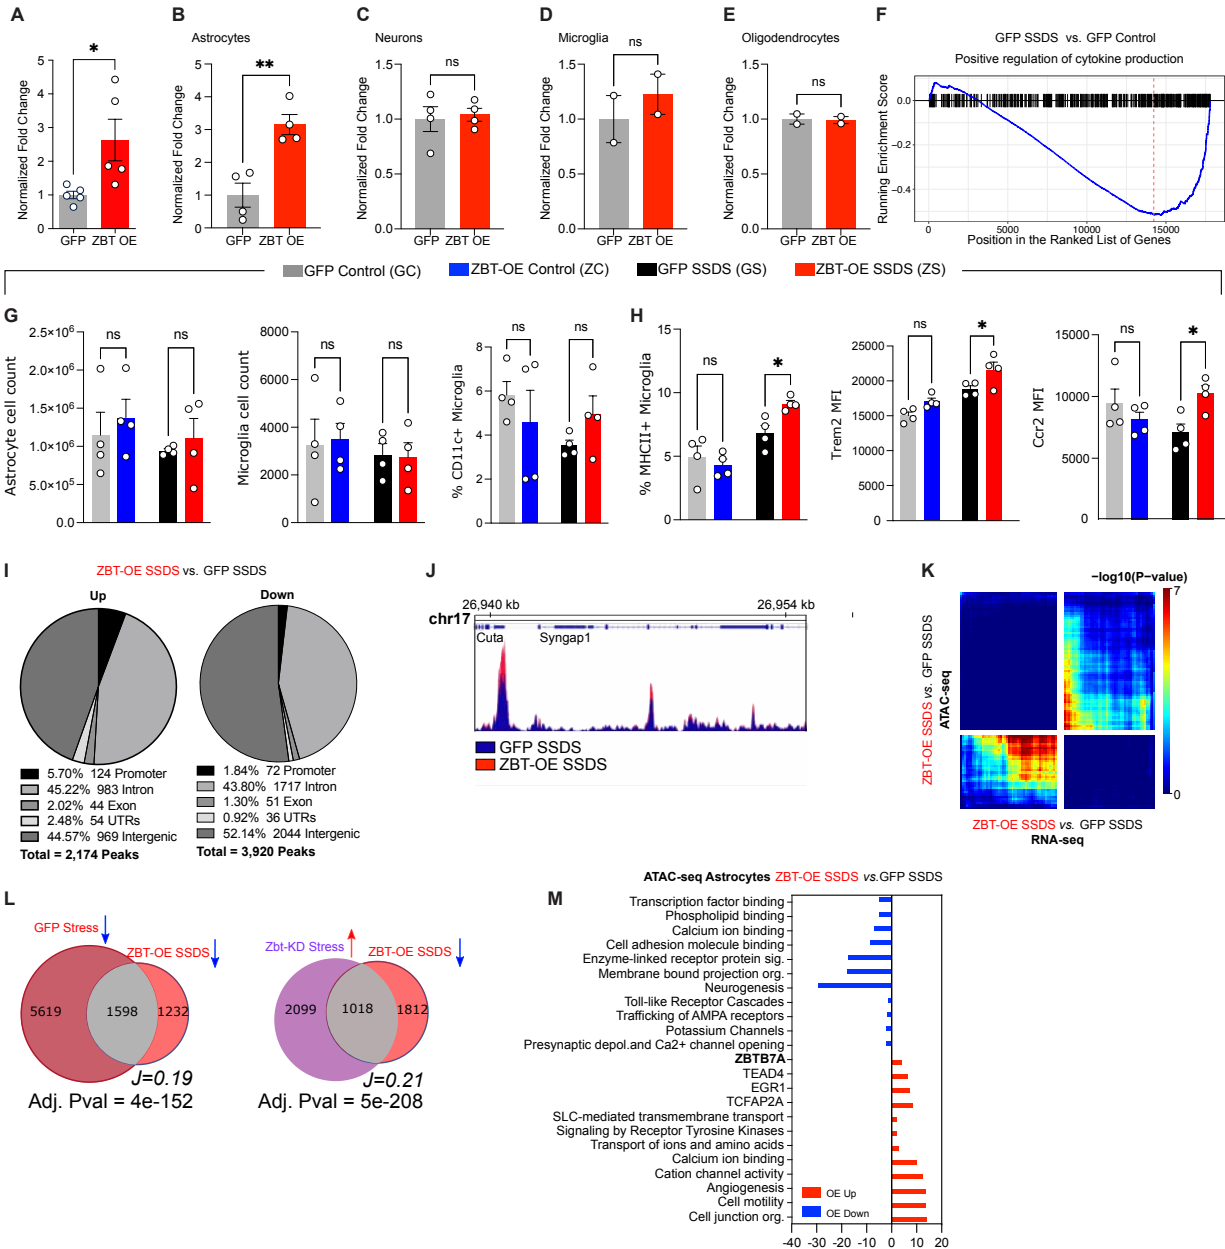

1882

1883 **Supplementary Figure 4. ZBTB7A OE in OFC astrocytes promotes significant alterations**  
 1884 **in behavior, chromatin accessibility, and gene expression.**

1885

1886 (A) Normalized fold change of qPCR *Zbtb7a* gene expression from OFC tissues transduced with  
 1887 ZBTB7A OE virus vs. GFP, n = 5/group. (B-E) qPCR expression levels of *Zbtb7a* in MACs-  
 1888 isolated (B) astrocytes and (C) neurons (D) microglia and (E) oligodendrocytes from AAV6-GFAP-  
 1889 ZBT OE transduced virally-transduced OFC mouse tissues, n = 2-4/group. (F) GSEA enrichment  
 1890 plot for most significantly enriched gene set in GFP Stress vs. GFP Control in bulk OFC tissue.

1891 (G) Number of astrocytes [left], and microglia<sup>6</sup> per organ. (H) Percent CD11c+ microglia [far left],

1892 percent MHCII+ microglia [left], Trem2 MFI<sup>6</sup> and Ccr2 [far right] MFI<sup>6</sup> in virally transduced ZBT-  
1893 OE vs. GFP mice (+/- SSDS) OFC via flow cytometry, n = 4/group. Gating strategy shown in  
1894 **Supplementary Fig. 6.** (I) ATAC-seq diffReps analysis of differential accessibility comparing  
1895 ZBT-OE SSDS vs. GFP SSDS. Pie charts indicate distribution of differential accessibility events,  
1896 stratified by genomic context. (J) Representative pile-up traces of cell specific ATAC-seq signal  
1897 overlapping Syngap1 gene. (K) RRHO comparing gene expression profile of MACs-isolated  
1898 astrocytes with MACS-isolated astrocyte chromatin accessibility for indicated conditions. (L) Venn  
1899 diagram and odds ratio analysis of the shared and distinct OCRs from ATAC-seq diffreps analysis  
1900 between indicated conditions. (M) GO pathway analysis of gene targets associated with  
1901 differentially expressed [red is more accessible, blue is less accessible] chromatin regions  
1902 between ZBT-OE SSDS and GFP OE SSDS. Data were analyzed with Student's two-tailed t-tests  
1903 or with 2-way ANOVA, or 3-way ANOVA, followed by 2-Way ANOVAs for MC comparisons,  
1904 \*=p<.05, \*\*=p<.01. All data graphed as means ± SEM.  
1905



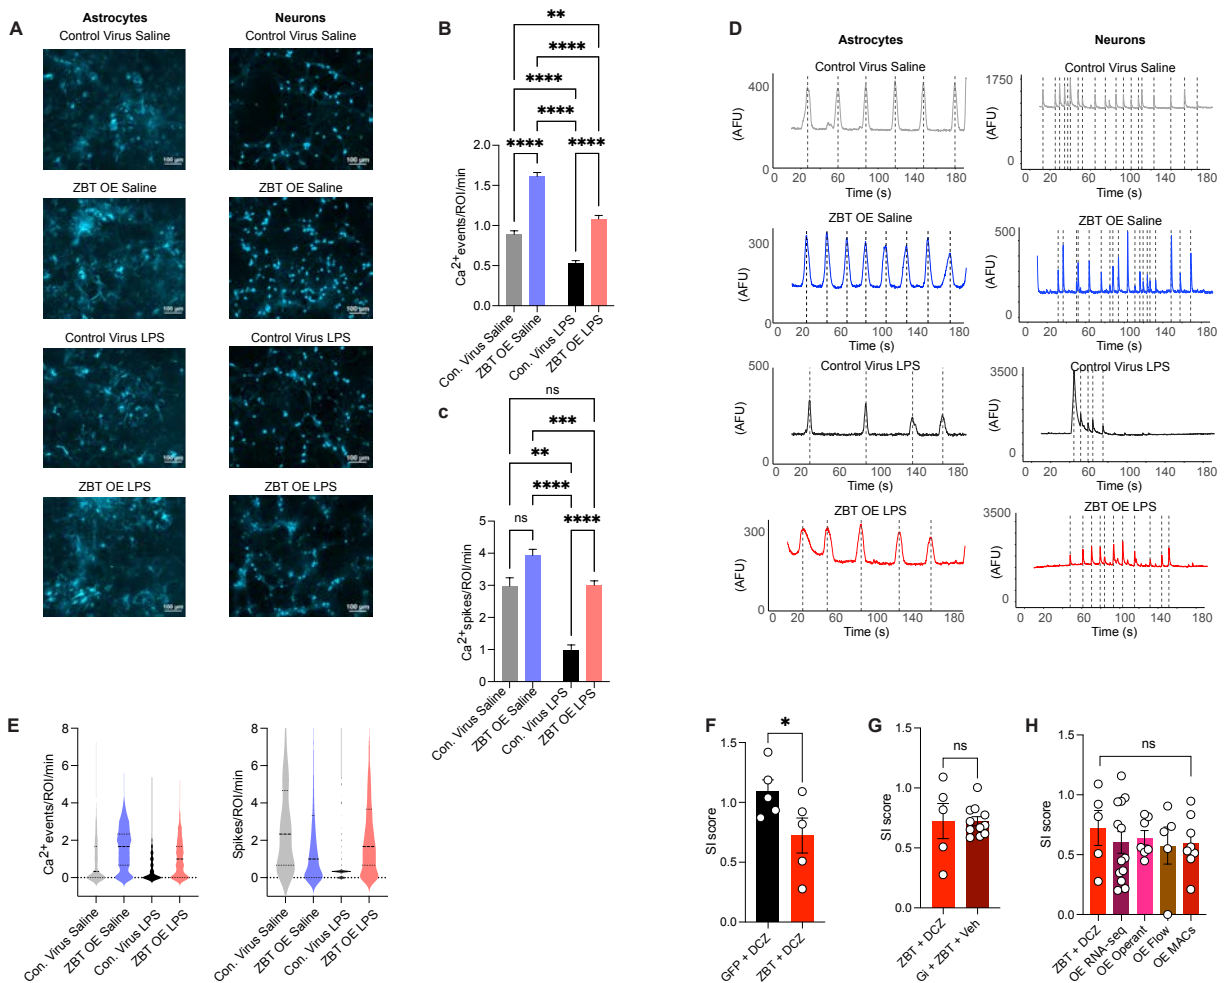

1906

1907

### Supplemental Figure 5. Calcium imaging and chemogenetic manipulations in the context of astrocyte-specific ZBT7A OE.

1908

1909

1910 (A) Representative images show gCAMP6f-expressing cells in either astrocyte-treated or neuron-

1911 treated primary co-cultures. (B) Mean frequency of Ca<sup>2+</sup> events detected in astrocytes

1912 expressing gCAMP6f. “Con.” Indicates Control. Representative traces show (C) Mean frequency

1913 of Ca<sup>2+</sup> event detected in neurons expressing gCAMP6f. “Con.” Indicates Control. (D)

1914 Representative traces for calcium event frequencies in astrocytes [left] and neurons<sup>6</sup>. (E) Violin

1915 plots depicting individual values for (right) astrocyte [*n*=623 cells control virus saline, *n*= 559 cells

1916 ZBT-OE saline, *n*=747 cells control virus LPS, and *n*=517 cells ZBT-OE LPS] and (left) neuronal

1917 [*n*=135 cells control virus saline, *n*= 1277 cells ZBT-OE saline, *n*=238 cells control virus LPS, and

1918 *n*=1324 cells ZBT OE LPS] calcium events. (F) Social interaction score for ZBT OE SSDS vs.

1919 GFP SSDS mice injected with DCZ. (G) Social interaction score for ZBT-OE SSDS vs. ZBT-OE

1920 + G<sub>i</sub> DREADD + vehicle. (H) Comparison of SI score across multiple cohorts of ZBT-OE SSDS

1921 animals. Data were analyzed with Student's two-tailed t-tests or with 1-way ANOVA plus Tukey's  
1922 MC test, \* $p < .05$ , \*\* $p < .01$ , \*\*\* $p < .001$ , \*\*\*\* $p < .0001$ . All data graphed as means  $\pm$  SEM.  
1923

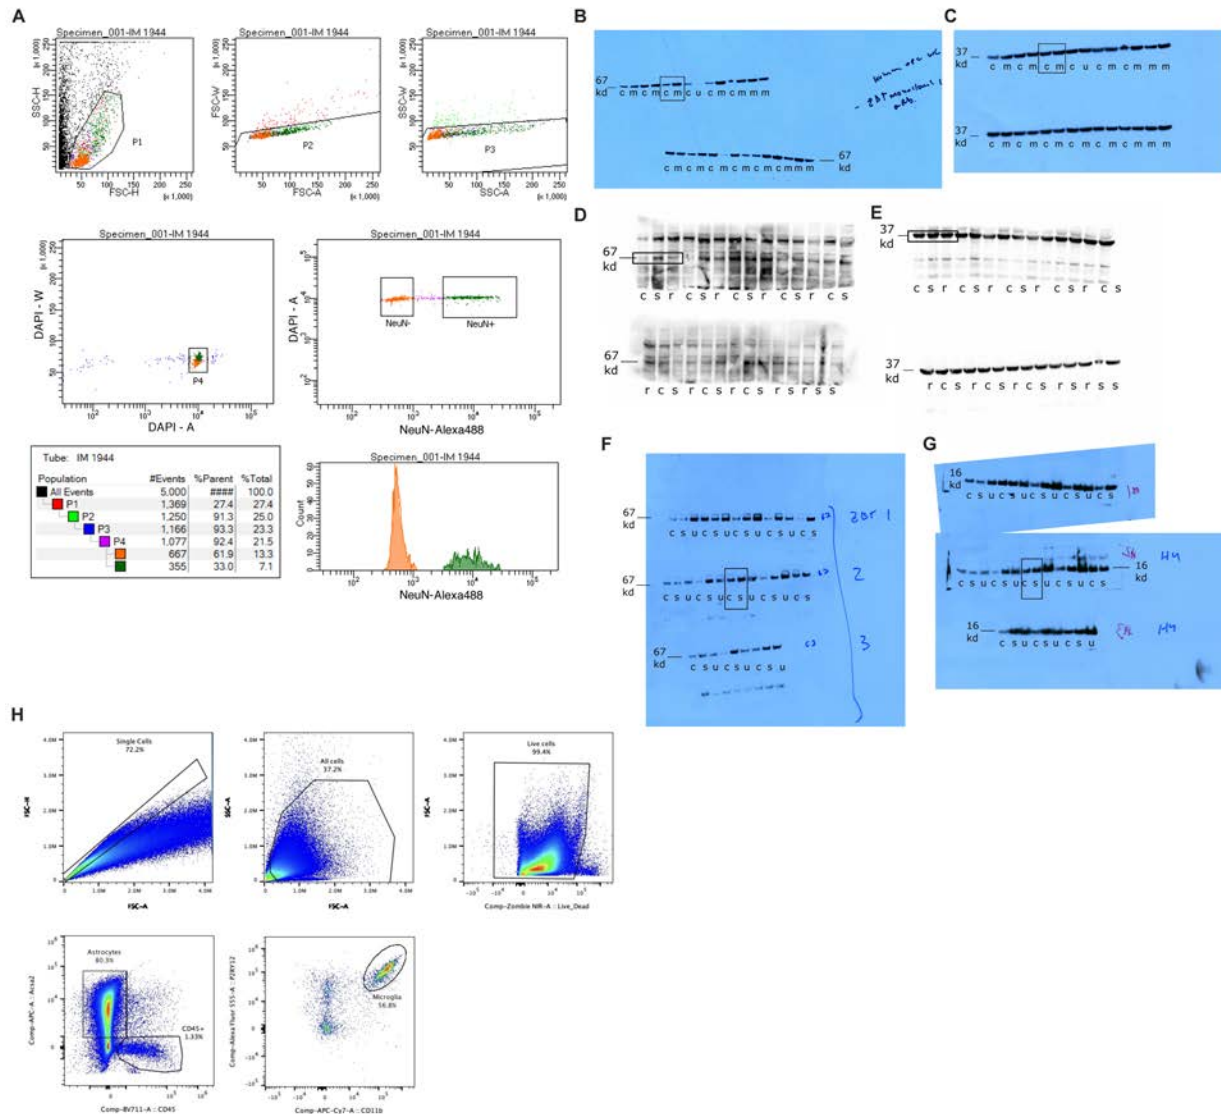

1924

1925 **Supplemental Figure 6. Flow cytometry gating and raw blots**

1926 (A) For FANS-coupled ATAC-seq on human postmortem tissues, nuclear populations were  
 1927 initially gated by side and forward scatter to differentiate nuclei from cellular debris. Populations  
 1928 were then gated based on DAPI staining to identify singlets and to further disregard debris. DAPI  
 1929 positive nuclei were subsequently gated based on NeuN staining to differentiate neurons (NeuN<sup>+</sup>)  
 1930 from non-neurons (NeuN<sup>-</sup>). Final nuclei population abundance for non-Neurons (NeuN<sup>-</sup>): 70.5%  
 1931 (in orange) and for neurons (NeuN<sup>+</sup>): 29.5% (in green). (B) Western blot film scan for ZBTB7A in  
 1932 bulk human OFC tissue, MDD (labeled "m") vs. controls (labeled "c"). ZBTB7A band at expected  
 1933 molecular weight of 67kDa. Note samples labeled "u" are not included in this manuscript due to  
 1934 lack of signal (suspected improper nuclear lysis). (C) Western blot film scan for housekeeping

1935 gene GAPDH in human OFC, MDD vs. controls. Run on the same membrane as ZBTB7A in (B).  
1936 **(D)** Raw image from chemidoc for western blot film for Zbtb7a in male mouse OFC, 48 hours after  
1937 final defeat. CSDS susceptible (labeled “s”) vs. CSDS resilient (labeled “r”) vs. controls (labeled  
1938 “c”). **(E)** Raw image from chemidoc western blot film for Gapdh loading control in male mouse  
1939 OFC, CSDS susceptible vs. resilient vs. controls. Run on the same membrane as Zbtb7a in (D).  
1940 **(F)** Western blot film scan for Zbtb7a in male mouse OFC, 21 days after final defeat. CSDS  
1941 susceptible (labeled “s”) vs. controls (labeled “c”). Note samples labeled “u” are from an unrelated  
1942 study, and not included in this manuscript. **(G)** Western blot film scan for H3.3 loading control in  
1943 male mouse OFC, CSDS susceptible vs. controls (note H3.3 was used for these blots due to use  
1944 of nuclear lysates, Gapdh could not be used). Run on the same membrane as Zbtb7a in (F). **(H)**  
1945 Gating strategy used to identify cell populations in the OFC of mouse OE experiments (Fig. S4).  
1946  
1947

1948 **Supplemental References**

1949

1950 1 Uhlén, M. *et al.* Tissue-based map of the human proteome. *Science* **347** (2015).

1951 2 Zhang, X. *et al.* CellMarker: a manually curated resource of cell markers in human and  
1952 mouse. *Nucleic acids research* **47**, D721-D728 (2019).

1953 3 Lachmann, A. *et al.* ChEA: transcription factor regulation inferred from integrating  
1954 genome-wide ChIP-X experiments. *Bioinformatics* **26**, 2438-2444 (2010).

1955 4 Labonté, B. *et al.* Sex-specific transcriptional signatures in human depression. *Nature*  
1956 *medicine* **23**, 1102 (2017).

1957 5 McKenzie, A. T. *et al.* Brain cell type specific gene expression and co-expression  
1958 network architectures. *Scientific reports* **8**, 1-19 (2018).

1959 6 Wright, C. F. *et al.* Making new genetic diagnoses with old data: iterative reanalysis and  
1960 reporting from genome-wide data in 1,133 families with developmental disorders.  
1961 *Genetics in Medicine* **20**, 1216-1223 (2018).

1962

1963
